# Supplementary material
Source: MDPI journal article supplement (https://www.mdpi.com/2311-7524/9/1/53)
Supplement: s1 [file s1 › horticulturae-2105214-supplementary.pdf]

## Supplementary Materials

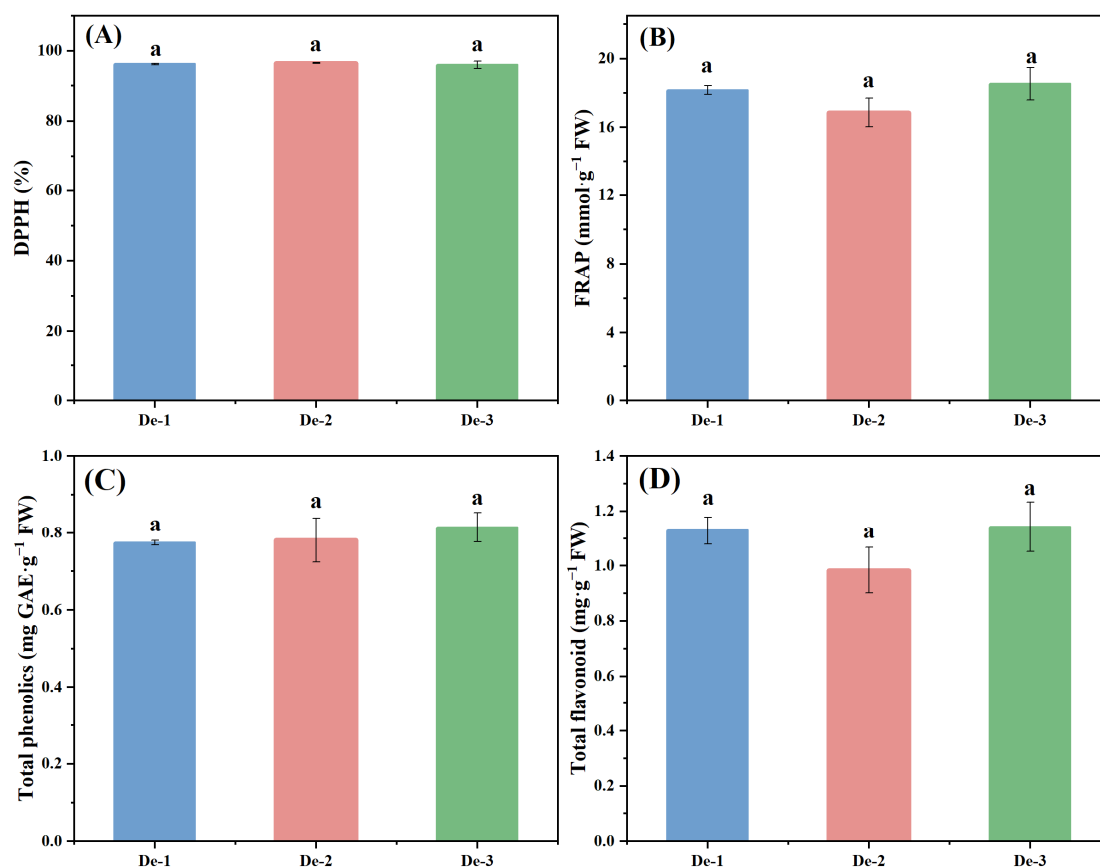

**Supplementary Figure S1.** Total polyphenols and flavonoids content and antioxidant capacity of kale grown under different nutrient-solution depths. (A) DPPH = 2,2-diphenyl-1-picrylhydrazyl, (B) FRAP = ferric-reducing antioxidant power, (C) total phenolics, (D) total flavonoid. Different letters (a–c) marked upon the columns in the figure indicate significant differences between treatments by Duncan's multiple (p < 0.05), and vertical bars represent the standard margin of error.
